# Supplementary material for: Conformational readout of RNA by small ligands
Source: PubMed Central journal article supplement — RNA Biol. 2013 Apr 16;10(6):981–9. doi: 10.4161/rna.24682 (PMC4111737; doi:10.4161/rna.24682), 2013-04-16
Supplement: rna-10-981-s01.pdf [file rna-10-981-s01.pdf]

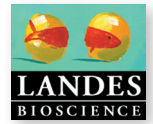

## **Supplemental Material to:**

**Efrat Kligun and Yael Mandel-Gutfreund**

**Conformational readout of RNA by small ligands**

**2013; 10(6)**

**<http://dx.doi.org/10.4161/rna.24682>**

**[www.landesbioscience.com/journals/rnabiology/article/24682/](http://www.landesbioscience.com/journals/rnabiology/article/24682/)**

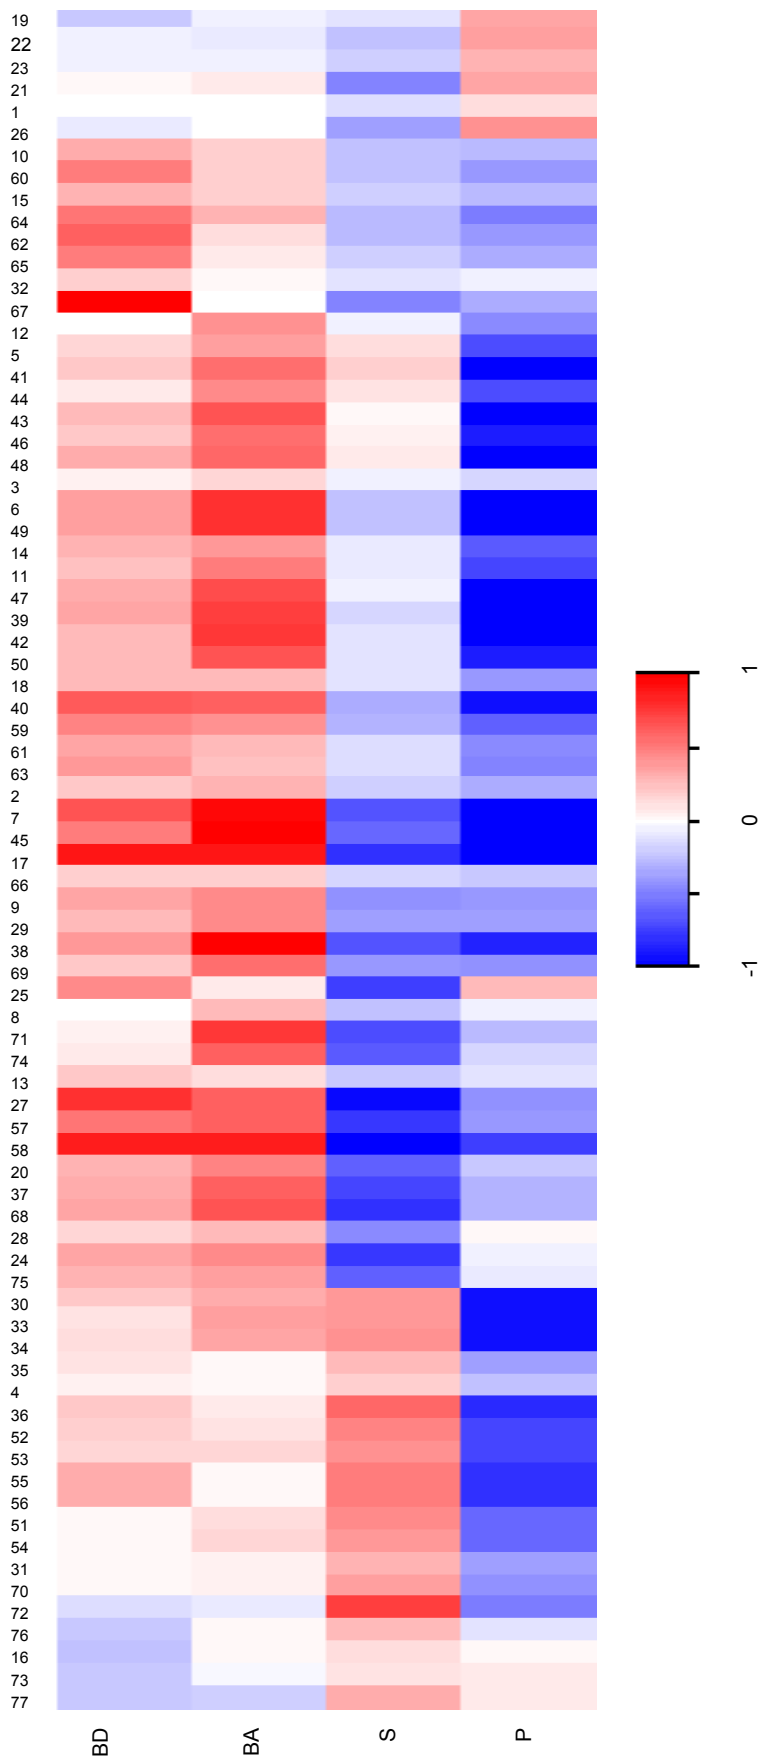

**Figure S1:** The physicochemical properties of ligand-binding pockets on RNA of 77 structures of RNA ligand complexes. BD denotes base donors, BA base acceptors, S sugar and P phosphate atoms. Numbers represent the index of the complex listed in Supplemental Table S1. The color scheme refers to the standardized score calculated against a background of 70,912 computed pockets (calculated by the *Solvent program*). Scores were scaled to range from -1 to 1. Significant biases relative to the background average are colored red and blue for over- and under-representation, respectively

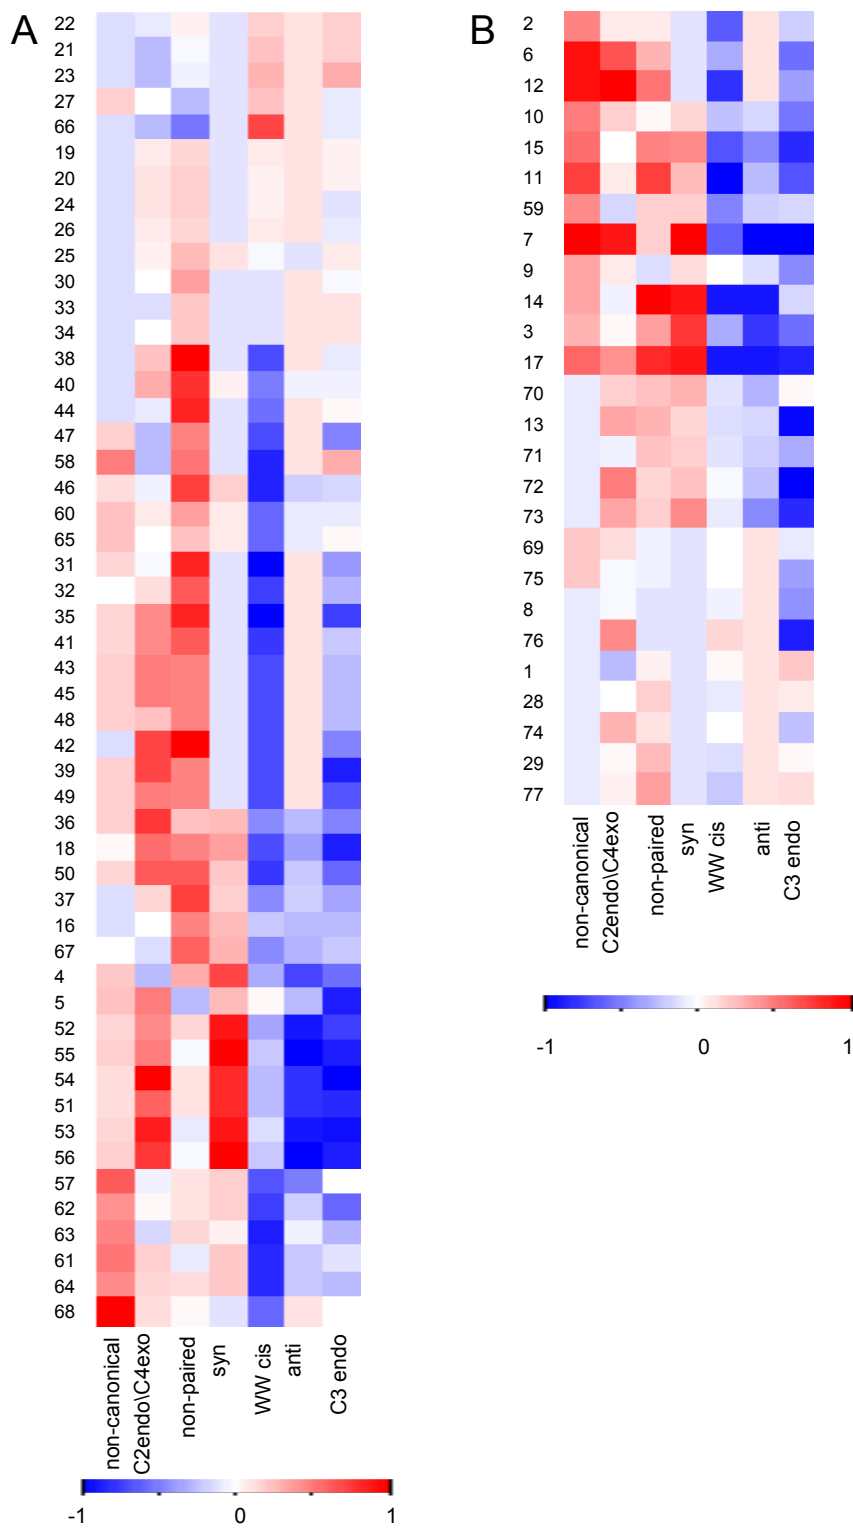

**Figure S2:** (A) The structural properties of ligand-binding pockets on RNA of X-ray structures of RNA ligand complexes (indices are given in Supplemental Table S1). The color scheme refers to the standardized score calculated against a background of computed pockets derived from the same technique (X-ray) as the structure of the RNA-ligand complex (calculated by the *Solvent program*). Scores were scaled to range from -1 to 1. Significant preferences of properties relative to the background of all RNA pockets are colored red (1) while blue denotes under-representation (-1). (B) The structural properties of ligand-binding pockets on RNA of NMR structures of RNA ligand complexes

## Supplementary Tables

**Table S1:** List of RNA-ligand complexes\*

| <b>Index</b> | <b>PDB</b>  | <b>Ligand</b>                  | <b>RNA group</b>               | <b>NMR/<br/>X-ray**</b> |
|--------------|-------------|--------------------------------|--------------------------------|-------------------------|
| <b>1</b>     | <b>2KX8</b> | <b>Arginine</b>                | <b>7SK snRNA</b>               | <b>NMR</b>              |
| <b>2</b>     | <b>1FMN</b> | <b>Flavin mononucleotide</b>   | <b>FMN aptamer</b>             | <b>NMR</b>              |
| <b>3</b>     | <b>1Q8N</b> | <b>Malachite green</b>         | <b>Malachite green aptamer</b> | <b>NMR</b>              |
| 4            | 1F1T        | Tetramethylrosamine            | Malachite green aptamer        | 2.80Å                   |
| <b>5</b>     | <b>1ET4</b> | <b>Vitamin B12</b>             | <b>Vitamin B12 aptamer</b>     | <b>2.30Å</b>            |
| 6            | 1O15        | Theophylline                   | Theophylline aptamer           | NMR                     |
| <b>7</b>     | <b>1KOC</b> | <b>Arginine</b>                | <b>Arginine aptamer</b>        | <b>NMR</b>              |
| <b>8</b>     | <b>1NEM</b> | <b>Neomycin B</b>              | <b>Neomycin aptamer</b>        | <b>NMR</b>              |
| <b>9</b>     | <b>1NBK</b> | <b>Argininamide</b>            | <b>TAT protein aptamer</b>     | <b>NMR</b>              |
| <b>10</b>    | <b>2TOB</b> | <b>Tobramycin</b>              | <b>Tobramycin aptamer</b>      | <b>NMR</b>              |
| <b>11</b>    | <b>1AM0</b> | <b>Adenosine monophosphate</b> | <b>AMP aptamer</b>             | <b>NMR</b>              |
| <b>12</b>    | <b>1EHT</b> | <b>Theophylline</b>            | <b>Theophylline aptamer</b>    | <b>NMR</b>              |
| 13           | 1TOB        | Tobramycin                     | Tobramycin aptamer             | NMR                     |
| <b>14</b>    | <b>1RAW</b> | <b>Adenosine monophosphate</b> | <b>ATP aptamer</b>             | <b>NMR</b>              |
| <b>15</b>    | <b>2AU4</b> | <b>Guanosine triphosphate</b>  | <b>GTP aptamer</b>             | <b>NMR</b>              |

|           |             |                              |                                |              |
|-----------|-------------|------------------------------|--------------------------------|--------------|
| <b>16</b> | <b>1F27</b> | <b>Biotin</b>                | <b>Biotin aptamer</b>          | <b>1.30Å</b> |
| <b>17</b> | <b>1KOD</b> | <b>Citrulline</b>            | <b>Citrulline aptamer</b>      | <b>NMR</b>   |
| <b>18</b> | <b>1NTA</b> | <b>Streptomycin</b>          | <b>Streptomycin aptamer</b>    | <b>2.90Å</b> |
| 19        | 2FD0        | Lividomycin                  | DIS-HIV1                       | 1.80Å        |
| 20        | 2FCX        | Neomycin A                   | DIS-HIV1                       | 2.00Å        |
| <b>21</b> | <b>3C7R</b> | <b>Neomycin</b>              | <b>DIS-HIV1</b>                | <b>1.70Å</b> |
| 22        | 3C5D        | Lividomycin                  | DIS-HIV1                       | 1.80Å        |
| 23        | 3C44        | Paromomycin                  | DIS-HIV1                       | 2.00Å        |
| 24        | 2FCZ        | Ribostamycin                 | DIS-HIV1                       | 2.01Å        |
| 25        | 1XPF        | Spermine                     | DIS-HIV1                       | 2.30Å        |
| 26        | 2FCY        | Neomycin                     | DIS-HIV1                       | 2.20Å        |
| <b>27</b> | <b>1FUF</b> | <b>Spermine</b>              | <b>Duplex</b>                  | <b>1.70Å</b> |
| <b>28</b> | <b>2JUK</b> | <b>Guandinoneomycin B</b>    | <b>HIV1 helix</b>              | <b>NMR</b>   |
| <b>29</b> | <b>2KTZ</b> | <b>ISH</b>                   | <b>HCV IRES Domain IIa RNA</b> | <b>NMR</b>   |
| 30        | 3GX3        | S-Adenosyl-L-homocysteine    | SAM-I riboswitch               | 2.70Å        |
| 31        | 3E5F        | SE-adenosyl-serenomethionine | SAM-III riboswitch             | 2.70Å        |
| 32        | 3E5E        | S-Adenosyl-L-homocysteine    | SAM-III riboswitch             | 2.90Å        |
| <b>33</b> | <b>3GX5</b> | <b>S-Adenosylmethionine</b>  | <b>SAM-I riboswitch</b>        | <b>2.40Å</b> |
| 34        | 3GX2        | Sinefungin                   | SAM-I riboswitch               | 2.90Å        |
| <b>35</b> | <b>3E5C</b> | <b>S-Adenosylmethionine</b>  | <b>SAM-III riboswitch</b>      | <b>2.25Å</b> |
| 36        | 3NPQ        | S-Adenosyl-L-homocysteine    | SAM riboswitch                 | 2.18Å        |
| <b>68</b> | <b>2QWY</b> | <b>S-Adenosylmethionine</b>  | <b>SAM-II riboswitch</b>       | <b>2.80Å</b> |
| <b>37</b> | <b>3OWW</b> | <b>Glycine</b>               | <b>Glycine riboswitch</b>      | <b>2.80Å</b> |
| 38        | 3LA5        | 5-Azacytosine                | Purine riboswitch              | 1.70Å        |

|           |             |                                      |                          |              |
|-----------|-------------|--------------------------------------|--------------------------|--------------|
| <b>39</b> | <b>1Y26</b> | <b>Adenine</b>                       | <b>Purine riboswitch</b> | <b>2.10Å</b> |
| 41        | 3GAO        | Xanthine                             | Purine riboswitch        | 1.90Å        |
| 42        | 3G4M        | 9H-purin-2-amine                     | Purine riboswitch        | 2.40Å        |
| 43        | 3GOT        | 2-Fluoroadenine                      | Purine riboswitch        | 1.95Å        |
| 44        | 3DS7        | 2'-Deoxyguanosine                    | Purine riboswitch        | 1.85Å        |
| 45        | 2G9C        | Pyrimidine-2,4,6-truamine            | Purine riboswitch        | 1.70Å        |
| 46        | 3GER        | 6-Chloroguanine                      | Purine riboswitch        | 1.70Å        |
| 47        | 3FO6        | 6-O-methylguanine                    | Purine riboswitch        | 1.90Å        |
| 48        | 2B57        | 9H-purine-2,6-diamine                | Purine riboswitch        | 2.15Å        |
| 49        | 2EES        | Hypoxanthine                         | Purine riboswitch        | 1.75Å        |
| <b>50</b> | <b>1Y27</b> | <b>Guanine</b>                       | <b>Purine riboswitch</b> | <b>2.40Å</b> |
| <b>40</b> | <b>3F2Q</b> | <b>Flavin mononucleotide</b>         | <b>FMN riboswitch</b>    | <b>2.95Å</b> |
| 51        | 3DIR        | Lysine derivatives                   | Lysine riboswitch        | 2.90Å        |
| <b>52</b> | <b>3D0U</b> | <b>Lysine</b>                        | <b>Lysine riboswitch</b> | <b>2.80Å</b> |
| 53        | 3DIG        | Lysine derivatives                   | Lysine riboswitch        | 2.80Å        |
| 54        | 3DIQ        | Lysine derivatives                   | LLysine riboswitch       | 2.70Å        |
| 55        | 3DJ0        | Lysine derivatives                   | Lysine riboswitch        | 2.50Å        |
| 56        | 3DIL        | Lysine                               | Lysine riboswitch        | 1.90Å        |
| 57        | 3K1V        | 7-Deaza-7-aminomethyl-guanine        | PreQ1 riboswitch         | 2.20Å        |
| 58        | 3GCA        | PreQ0                                | PreQ1 riboswitch         | 2.75Å        |
| <b>59</b> | <b>2L1V</b> | <b>7-Deaza-7-aminomethyl-guanine</b> | <b>PreQ1 riboswitch</b>  | <b>NMR</b>   |
| 60        | 2HOM        | Thiamine phosphate                   | TPP riboswitch           | 2.89Å        |
| 61        | 3D2X        | Oxythiamine                          | TPP riboswitch           | 2.50Å        |

|           |             |                                        |                                            |              |
|-----------|-------------|----------------------------------------|--------------------------------------------|--------------|
|           |             | pylophosphate                          |                                            |              |
| <b>62</b> | <b>2CKY</b> | <b>Thiamine diphosphate</b>            | <b>TPP riboswitch</b>                      | <b>2.90Å</b> |
| 63        | 3D2G        | Thiamine diphosphate                   | TPP riboswitch                             | 2.25Å        |
| 64        | 3D2V        | Pyolithiamine<br>pylophosphate         | TPP riboswitch                             | 2.00Å        |
| 65        | 2GDI        | Thiamine diphosphate                   | TPP riboswitch                             | 2.05Å        |
| <b>66</b> | <b>1NYI</b> | <b>Guanosine-5'-<br/>Monophosphate</b> | <b>Hammerhead<br/>Ribozyme</b>             | <b>2.85Å</b> |
| <b>67</b> | <b>2HO7</b> | <b>Glucose-6-phosphate</b>             | <b>Glms ribozyme</b>                       | <b>2.90Å</b> |
| 69        | 1UUD        | Designer ligands                       | TAR-HIV1                                   | NMR          |
| <b>70</b> | <b>1LVJ</b> | <b>Acetylpromazine</b>                 | <b>TAR-HIV1</b>                            | <b>NMR</b>   |
| 71        | 1ARJ        | Arginine                               | TAR-HIV1                                   | NMR          |
| 72        | 1QD3        | Neomycin B                             | TAR-HIV1                                   | NMR          |
| 73        | 1UTS        | Designer ligands                       | TAR-HIV1                                   | NMR          |
| 74        | 1AKX        | Arginine                               | TAR-HIV2                                   | NMR          |
| 75        | 1UUI        | Designer ligands                       | TAR-HIV2                                   | NMR          |
| 76        | 2KGP        | Mitoxantrone                           | Splicing<br>regulatory<br>element          | NMR          |
| <b>77</b> | <b>1EI2</b> | <b>Neomycin</b>                        | <b>Splicing<br/>regulatory<br/>element</b> | <b>NMR</b>   |

\* Representative pockets are highlighted in gray

\*\*For structures solved by x-ray crystallography the resolution of the structures is given

**Table S2:** Comparison between the predicted and known pockets using the program 'Solvent'

| <b>PDB</b> | <b>Number of pockets</b> | <b>Number of Common nucleotides</b> | <b>PPV</b> | <b>Sensitivity</b> |
|------------|--------------------------|-------------------------------------|------------|--------------------|
| 2KGP       | 9                        | 2/9                                 | 0.17       | 0.22               |
| 3DIR       | 546                      | 9/12                                | 0.75       | 0.75               |
| 3GX3       | 249                      | 11/17                               | 0.92       | 0.65               |
| 1FMN       | 32                       | 10/10                               | 0.83       | 1                  |
| 2KX8       | 63                       | 11/11                               | 0.92       | 1                  |
| 3D0U       | 489                      | 8/11                                | 0.67       | 0.73               |
| 1Q8N       | 61                       | 12/15                               | 1          | 0.8                |
| 1UUD       | 23                       | 12/15                               | 1          | 0.8                |
| 2FD0       | 54                       | 12/15                               | 1          | 0.8                |
| 1LVJ       | 6                        | 10/11                               | 0.83       | 0.91               |
| 2JUK       | 13                       | 12/16                               | 1          | 0.75               |
| 1F1T       | 39                       | 9/9                                 | 0.75       | 1                  |
| 3E5F       | 97                       | 11/11                               | 0.92       | 1                  |
| 3E5E       | 94                       | 12/13                               | 1          | 0.92               |
| 1ET4       | 432                      | 10/10                               | 0.83       | 1                  |
| 3K1V       | 28                       | 10/10                               | 0.83       | 0.83               |
| 1ARJ       | 31                       | 12/15                               | 1          | 0.8                |
| 1O15       | 51                       | 10/10                               | 0.83       | 1                  |
| 3LA5       | 165                      | 9/10                                | 0.75       | 0.9                |
| 1NYI       | 44                       | 1/5                                 | <b>NA</b>  | <b>NA</b>          |
| 3F2Q       | 212                      | 11/21                               | 0.92       | 0.52               |
| 1KOC       | 14                       | 11/12                               | 0.92       | 0.92               |
| 1NEM       | 29                       | 12/17                               | 1          | 0.71               |
| 2FCX       | 68                       | 12/14                               | 1          | 0.86               |



|      |     |       |      |      |
|------|-----|-------|------|------|
| 3GAO | 134 | 8/11  | 0.67 | 0.73 |
| 3G4M | 143 | 9/10  | 0.75 | 0.9  |
| 2HO7 | 381 | 11/18 | 0.92 | 0.61 |
| 1NBK | 40  | 12/20 | 1    | 0.6  |
| 3GOT | 130 | 7/10  | 0.58 | 0.7  |
| 3DIG | 542 | 7/11  | 0.58 | 0.64 |
| 3C7R | 50  | 12/15 | 1    | 0.8  |
| 1QD3 | 34  | 10/13 | 0.83 | 0.77 |
| 3C5D | 51  | 12/26 | 1    | 0.46 |
| 2QWY | 255 | 12/18 | 1    | 0.67 |
| 1FUF | 24  | 12/20 | 1    | 0.6  |
| 3C44 | 76  | 12/16 | 1    | 0.75 |
| 2HOM | 155 | 11/20 | 0.92 | 0.55 |
| 3DS7 | 378 | 11/13 | 0.92 | 0.85 |
| 3GCA | 39  | 10/12 | 0.83 | 0.83 |
| 2TOB | 12  | 12/17 | 1    | 0.71 |
| 2FCZ | 158 | 12/14 | 1    | 0.86 |
| 1UTS | 8   | 5/8   | 0.42 | 0.63 |
| 2G9C | 138 | 7/10  | 0.58 | 0.7  |
| 1AM0 | 5   | 12/12 | 1    | 1    |
| 1Y26 | 162 | 7/10  | 0.58 | 0.7  |
| 1EHT | 29  | 10/10 | 0.83 | 1    |
| 3GX5 | 266 | 12/17 | 1    | 0.71 |
| 1AKX | 19  | 12/14 | 1    | 0.86 |
| 1TOB | 29  | 12/17 | 1    | 0.71 |
| 3GER | 129 | 9/12  | 0.75 | 0.75 |
| 1UUI | 13  | 12/14 | 1    | 0.86 |

|      |     |       |      |      |
|------|-----|-------|------|------|
| 3OWW | 437 | 8/12  | 0.67 | 0.67 |
| 3FO6 | 142 | 8/10  | 0.67 | 0.8  |
| 3D2X | 499 | 12/23 | 1    | 0.52 |
| 2CKY | 346 | 12/24 | 1    | 0.5  |
| 1RAW | 55  | 12/13 | 1    | 0.92 |
| 1XPF | 56  | 12/16 | 1    | 0.75 |
| 2B57 | 131 | 7/10  | 0.58 | 0.7  |
| 2AU4 | 53  | 12/16 | 1    | 0.75 |
| 1F27 | 35  | 10/10 | 0.83 | 1    |
| 3D2G | 496 | 12/22 | 1    | 0.55 |
| 3GX2 | 270 | 12/17 | 1    | 0.71 |
| 1KOD | 23  | 12/13 | 1    | 0.92 |
| 2FCY | 60  | 12/15 | 1    | 0.8  |
| 2L1V | 48  | 12/16 | 1    | 0.75 |
| 3DIQ | 521 | 9/12  | 0.75 | 0.75 |
| 2EES | 138 | 7/10  | 0.58 | 0.7  |
| 1Y27 | 149 | 8/11  | 0.67 | 0.73 |
| 3E5C | 90  | 11/11 | 0.92 | 1    |
| 3D2V | 507 | 12/23 | 1    | 0.52 |
| 3DJ0 | 530 | 7/10  | 0.58 | 0.7  |
| 1EI2 | 25  | 12/18 | 1    | 0.67 |
| 2KTZ | 55  | 12/14 | 1    | 0.86 |
| 2GDI | 372 | 12/20 | 1    | 0.6  |
| 3DIL | 537 | 7/10  | 0.58 | 0.7  |
| 3NPQ | 261 | 9/10  | 0.75 | 0.9  |
| 1NTA | 39  | 12/15 | 1    | 0.8  |

Sensitivity and PPV were calculated for known binding sites that consist more than 5 nucleotides. Number of pockets represents the number of putative pockets that were predicted per each structure. The number of overlapping nucleotides were calculated for the pocket with the maximum number of overlapping nucleotides. Size of the predicted pocket was predefined as 12 nucleotides.

**Table S3:** Comparison between the predicted and the known pockets using the program 'Fpocket'

| PDB  | Number of pockets | Size of putative pocket | Size of the known binding site | Number of overlapping nucleotides | PPV  | Sensitivity |
|------|-------------------|-------------------------|--------------------------------|-----------------------------------|------|-------------|
| 2KGP | 1                 | 5                       | 9                              | 5                                 | NA   | NA          |
| 3DIR | 11                | 7                       | 12                             | 4                                 | 0.57 | 0.33        |
| 3GX3 | 9                 | 10                      | 17                             | 8                                 | 0.8  | 0.47        |
| 1FMN | 1                 | 6                       | 10                             | 6                                 | 1    | 0.6         |
| 2KX8 | 3                 | 9                       | 11                             | 9                                 | 1    | 0.82        |
| 3D0U | 17                | 12                      | 11                             | 9                                 | 0.75 | 0.82        |
| 1Q8N | 3                 | 14                      | 15                             | 13                                | 0.93 | 0.87        |
| 1UUD | 3                 | 5                       | 15                             | 5                                 | NA   | NA          |
| 2FD0 | 6                 | 12                      | 15                             | 9                                 | 0.75 | 0.6         |
| 1LVJ | 2                 | 6                       | 11                             | 6                                 | 1    | 0.55        |
| 2JUK | 0                 | 0                       | 16                             | 0                                 | NA   | NA          |
| 1FIT | 3                 | 4                       | 9                              | 4                                 | NA   | NA          |
| 3E5F | 3                 | 7                       | 11                             | 6                                 | 0.86 | 0.55        |
| 3E5E | 5                 | 4                       | 13                             | 4                                 | NA   | NA          |
| 1ET4 | 16                | 5                       | 10                             | 3                                 | NA   | NA          |
| 3K1V | 2                 | 6                       | 12                             | 6                                 | 1    | 0.5         |
| 1ARJ | 2                 | 13                      | 15                             | 11                                | 0.85 | 0.73        |
| 1O15 | 2                 | 11                      | 10                             | 9                                 | 0.82 | 0.9         |

|      |    |    |    |    |      |      |
|------|----|----|----|----|------|------|
| 3LA5 | 7  | 8  | 10 | 7  | 0.88 | 0.7  |
| 1NYI | 1  | 0  | 5  | 0  | NA   | NA   |
| 3F2Q | 5  | 35 | 21 | 15 | 0.43 | 0.71 |
| 1KOC | 3  | 9  | 12 | 8  | 0.89 | 0.67 |
| 1NEM | 1  | 13 | 17 | 13 | 1    | 0.76 |
| 2FCX | 4  | 4  | 14 | 4  | NA   | NA   |
| 3GAO | 8  | 10 | 11 | 10 | 1    | 0.91 |
| 3G4M | 6  | 14 | 10 | 4  | 0.29 | 0.4  |
| 2HO7 | 10 | 32 | 18 | 10 | 0.31 | 0.56 |
| 1NBK | 3  | 8  | 20 | 5  | 0.63 | 0.25 |
| 3GOT | 6  | 6  | 10 | 6  | 1    | 0.6  |
| 3DIG | 17 | 7  | 11 | 6  | 0.86 | 0.55 |
| 3C7R | 5  | 11 | 15 | 10 | 0.91 | 0.67 |
| 1QD3 | 5  | 12 | 13 | 7  | 0.58 | 0.54 |
| 3C5D | 4  | 6  | 26 | 6  | 1    | 0.23 |
| 2QWY | 17 | 16 | 18 | 16 | 1    | 0.89 |
| 1FUF | 3  | 14 | 20 | 14 | 1    | 0.7  |
| 3C44 | 3  | 16 | 16 | 8  | 0.5  | 0.5  |
| 2HOM | 8  | 25 | 20 | 14 | 0.56 | 0.7  |
| 3DS7 | 13 | 13 | 13 | 6  | 0.46 | 0.46 |
| 3GCA | 1  | 16 | 12 | 9  | 0.56 | 0.75 |
| 2TOB | 1  | 12 | 17 | 11 | 0.92 | 0.65 |
| 2FCZ | 11 | 15 | 14 | 6  | 0.4  | 0.43 |
| 1UTS | 5  | 7  | 8  | 7  | 1    | 0.88 |
| 2G9C | 4  | 12 | 10 | 9  | 0.75 | 0.9  |
| 1AM0 | 2  | 8  | 12 | 6  | 0.75 | 0.5  |
| 1Y26 | 7  | 20 | 10 | 4  | 0.2  | 0.4  |
| 1EHT | 2  | 5  | 10 | 5  | NA   | NA   |

|      |    |    |    |    |      |      |
|------|----|----|----|----|------|------|
| 3GX5 | 9  | 8  | 17 | 6  | 0.75 | 0.35 |
| 1AKX | 3  | 7  | 14 | 7  | 1    | 0.5  |
| 1TOB | 2  | 5  | 17 | 5  | NA   | NA   |
| 3GER | 6  | 8  | 12 | 4  | 0.5  | 0.33 |
| 1UUI | 3  | 8  | 14 | 5  | 0.63 | 0.36 |
| 3OWW | 21 | 5  | 12 | 3  | NA   | NA   |
| 3FO6 | 7  | 5  | 10 | 5  | NA   | NA   |
| 3D2X | 15 | 27 | 23 | 15 | 0.56 | 0.65 |
| 2CKY | 14 | 23 | 24 | 18 | 0.78 | 0.75 |
| 1RAW | 4  | 8  | 13 | 5  | 0.63 | 0.38 |
| 1XPF | 4  | 7  | 16 | 7  | 1    | 0.44 |
| 2B57 | 8  | 5  | 10 | 5  | NA   | NA   |
| 2AU4 | 2  | 14 | 16 | 12 | 0.86 | 0.75 |
| 1F27 | 3  | 10 | 10 | 5  | 0.5  | 0.5  |
| 3D2G | 16 | 30 | 22 | 18 | 0.6  | 0.82 |
| 3GX2 | 8  | 14 | 17 | 6  | 0.43 | 0.35 |
| 1KOD | 6  | 5  | 13 | 4  | NA   | NA   |
| 2FCY | 7  | 8  | 15 | 7  | 0.88 | 0.47 |
| 2L1V | 3  | 8  | 16 | 8  | 1    | 0.5  |
| 3DIQ | 16 | 29 | 12 | 4  | 0.14 | 0.33 |
| 2EES | 9  | 7  | 10 | 7  | 1    | 0.7  |
| 1Y27 | 6  | 10 | 11 | 5  | 0.5  | 0.45 |
| 3E5C | 2  | 10 | 11 | 10 | 1    | 0.91 |
| 3D2V | 10 | 15 | 23 | 11 | 0.73 | 0.48 |
| 3DJ0 | 16 | 7  | 10 | 4  | 0.57 | 0.4  |
| 1EI2 | 2  | 13 | 18 | 13 | 1    | 0.72 |
| 2KTZ | 2  | 8  | 14 | 8  | 1    | 0.57 |
| 2GDI | 17 | 11 | 20 | 11 | 1    | 0.55 |

|      |    |    |    |    |      |      |
|------|----|----|----|----|------|------|
| 3DIL | 15 | 12 | 10 | 9  | 0.75 | 0.9  |
| 3NPQ | 7  | 10 | 10 | 9  | 0.9  | 0.9  |
| 1NTA | 4  | 10 | 15 | 10 | 1    | 0.67 |

Sensitivity and PPV were calculated between the known binding sites and the computed pockets that consist more than 5 nucleotides. Number of pockets represents the number of putative pockets that were calculated for each structure. The number of overlapping nucleotides were calculated for the pocket with the highest overlap.

**Table S4: Detailed information on the distribution of nucleotides possessing the unique conformations in the representative ligand binding pockets**

| Name | Total number in pocket | syn | C2_endo | c4_exo | syn+ c2_endo | syn+ c4_exo |
|------|------------------------|-----|---------|--------|--------------|-------------|
| 2KX8 | 11                     | 0   | 0       | 0      | 0            | 0           |
| 1FMN | 10                     | 0   | 0       | 2      | 0            | 0           |
| 1Q8N | 15                     | 3   | 1       | 1      | 0            | 1           |
| 1F1T | 9                      | 2   | 0       | 0      | 0            | 0           |
| 1ET4 | 10                     | 1   | 3       | 0      | 1            | 0           |
| 1O15 | 10                     | 0   | 3       | 1      | 0            | 0           |
| 1KOC | 12                     | 3   | 3       | 4      | 2            | 1           |
| 1NEM | 17                     | 0   | 1       | 1      | 0            | 0           |
| 1NBK | 20                     | 1   | 0       | 4      | 0            | 0           |
| 2TOB | 17                     | 1   | 1       | 3      | 1            | 0           |
| 1AM0 | 12                     | 1   | 1       | 1      | 0            | 0           |
| 1EHT | 10                     | 0   | 5       | 0      | 0            | 0           |
| 1TOB | 17                     | 1   | 4       | 0      | 0            | 0           |
| 1RAW | 13                     | 3   | 1       | 0      | 1            | 0           |
| 2AU4 | 16                     | 2   | 1       | 1      | 0            | 0           |
| 1F27 | 10                     | 1   | 1       | 0      | 0            | 0           |
| 1KOD | 13                     | 3   | 1       | 4      | 1            | 2           |
| 1NTA | 15                     | 2   | 3       | 1      | 0            | 1           |
| 2FD0 | 15                     | 0   | 2       | 0      | 0            | 0           |
| 2FCX | 14                     | 0   | 2       | 0      | 0            | 0           |
| 3C7R | 15                     | 0   | 0       | 0      | 0            | 0           |
| 3C5D | 26                     | 0   | 2       | 0      | 0            | 0           |
| 3C44 | 16                     | 0   | 0       | 0      | 0            | 0           |
| 2FCZ | 14                     | 0   | 2       | 0      | 0            | 0           |
| 1XPF | 16                     | 1   | 2       | 0      | 1            | 0           |
| 2FCY | 15                     | 0   | 2       | 0      | 0            | 0           |
| 1FUF | 20                     | 0   | 2       | 0      | 0            | 0           |
| 2JUK | 16                     | 0   | 1       | 1      | 0            | 0           |

|      |    |   |   |   |   |   |
|------|----|---|---|---|---|---|
| 2KTZ | 14 | 0 | 1 | 1 | 0 | 0 |
| 3GX3 | 17 | 0 | 0 | 1 | 0 | 0 |
| 3E5F | 11 | 0 | 1 | 0 | 0 | 0 |
| 3E5E | 13 | 0 | 2 | 0 | 0 | 0 |
| 3GX5 | 17 | 0 | 1 | 0 | 0 | 0 |
| 3GX2 | 17 | 0 | 0 | 1 | 0 | 0 |
| 3E5C | 11 | 0 | 3 | 0 | 0 | 0 |
| 3NPQ | 10 | 1 | 4 | 0 | 1 | 0 |
| 3OWW | 12 | 1 | 2 | 0 | 0 | 0 |
| 3LA5 | 10 | 0 | 2 | 0 | 0 | 0 |
| 1Y26 | 10 | 0 | 2 | 1 | 0 | 0 |
| 3F2Q | 21 | 1 | 3 | 1 | 1 | 0 |
| 3GAO | 11 | 0 | 3 | 0 | 0 | 0 |
| 3G4M | 10 | 0 | 2 | 1 | 0 | 0 |
| 3GOT | 10 | 0 | 3 | 0 | 0 | 0 |
| 3DS7 | 13 | 0 | 1 | 0 | 0 | 0 |
| 2G9C | 10 | 0 | 3 | 0 | 0 | 0 |
| 3GER | 12 | 1 | 1 | 0 | 0 | 0 |
| 3FO6 | 10 | 0 | 0 | 0 | 0 | 0 |
| 2B57 | 10 | 0 | 2 | 0 | 0 | 0 |
| 2EES | 10 | 0 | 3 | 0 | 0 | 0 |
| 1Y27 | 11 | 1 | 2 | 1 | 0 | 0 |
| 3DIR | 12 | 3 | 4 | 0 | 2 | 0 |
| 3D0U | 11 | 3 | 3 | 0 | 1 | 0 |
| 3DIG | 11 | 3 | 3 | 1 | 1 | 0 |
| 3DIQ | 12 | 3 | 4 | 1 | 1 | 0 |
| 3DJ0 | 10 | 3 | 3 | 0 | 1 | 0 |
| 3DIL | 10 | 3 | 4 | 0 | 2 | 0 |
| 3K1V | 12 | 1 | 1 | 0 | 1 | 0 |
| 3GCA | 12 | 0 | 0 | 0 | 0 | 0 |
| 2L1V | 16 | 1 | 0 | 1 | 0 | 0 |
| 2HOM | 20 | 1 | 1 | 1 | 0 | 0 |
| 3D2X | 23 | 2 | 4 | 0 | 1 | 0 |



|      |    |   |   |   |   |   |
|------|----|---|---|---|---|---|
| 2CKY | 24 | 2 | 1 | 1 | 0 | 0 |
| 3D2G | 22 | 1 | 1 | 0 | 0 | 0 |
| 3D2V | 23 | 2 | 2 | 1 | 0 | 0 |
| 2GDI | 20 | 1 | 2 | 0 | 0 | 0 |
| 1NYI | 5  | 0 | 0 | 0 | 0 | 0 |
| 2HO7 | 18 | 2 | 1 | 0 | 0 | 0 |
| 2QWY | 18 | 0 | 1 | 1 | 0 | 0 |
| 1UUD | 15 | 0 | 1 | 2 | 0 | 0 |
| 1LVJ | 11 | 1 | 2 | 0 | 0 | 0 |
| 1ARJ | 15 | 1 | 0 | 2 | 0 | 0 |
| 1QD3 | 13 | 1 | 4 | 0 | 0 | 0 |
| 1UTS | 8  | 1 | 0 | 3 | 0 | 0 |
| 1AKX | 14 | 0 | 3 | 0 | 0 | 0 |
| 1UUI | 14 | 0 | 0 | 2 | 0 | 0 |
| 2KGP | 9  | 0 | 0 | 4 | 0 | 0 |
| 1EI2 | 18 | 0 | 1 | 2 | 0 | 0 |

**Table S5:** RNA ligands interactions

|                          |                  | C2endo+<br>C4exo | syn      | C2endo+C<br>4exo+syn | non-paired | non-<br>canonical |
|--------------------------|------------------|------------------|----------|----------------------|------------|-------------------|
| Hydrogen Bonds<br>(306)* | Total Pockets    | 186              | 66       | 25                   | 333        | 150               |
|                          | Overlap          | 55               | 28       | 13                   | 107        | 50                |
|                          | P value          | 0.361            | 0.0076   | 0.0096               | 0.035      | 0.083             |
|                          | Percent of bonds | 17.97            | 9.15     | 4.25                 | 34.97      | 16.34             |
| Van der Waals<br>(466)*  | Total Pockets    | 186              | 66       | 25                   | 333        | 150               |
|                          | Overlap          | 94               | 43       | 18                   | 136        | 80                |
|                          | P value          | 0.014            | 0.0002   | 0.0029               | 0.850      | 0.004             |
|                          | Percent of bonds | 20.17            | 9.23     | 3.86                 | 29.18      | 17.17             |
| Hydrophobic<br>(261)*    | Total Pockets    | 186              | 66       | 25                   | 333        | 150               |
|                          | Overlap          | 63               | 30       | 15                   | 60         | 43                |
|                          | P value          | 0.0006           | 7.13e-05 | 0.0001               | 0.999      | 0.097             |
|                          | Percent of bonds | 24.14            | 11.49    | 5.75                 | 22.99      | 16.48             |
| Aromatic<br>(118)*       | Total Pockets    | 186              | 66       | 25                   | 333        | 150               |
|                          | Overlap          | 24               | 9        | 1                    | 23         | 15                |
|                          | P value          | 0.1996           | 0.285    | 0.946                | 0.999      | 0.692             |
|                          | Percent of bonds | 20.34            | 7.63     | 0.85                 | 19.49      | 12.71             |

\* Total number of bonds of this category
